# Supplementary material for: Deep COVID DeteCT: an international experience on COVID-19 lung detection and prognosis using chest CT
Source: Springer Nature journal article supplement (doi:10.1038/s41746-020-00369-1), 2021-01-29
Supplement: 41746_2020_369_MOESM2_ESM.pdf [file 41746_2020_369_MOESM2_ESM.pdf]

## Supplementary Information

| CT Scanner Models, Products, and Specifications by Institution |                                                                                        |                                                                                               |                                                                  |                       |                                                                                  |                                                             |                      |                       |                                                                                                                                                        |                                                                                         |
|----------------------------------------------------------------|----------------------------------------------------------------------------------------|-----------------------------------------------------------------------------------------------|------------------------------------------------------------------|-----------------------|----------------------------------------------------------------------------------|-------------------------------------------------------------|----------------------|-----------------------|--------------------------------------------------------------------------------------------------------------------------------------------------------|-----------------------------------------------------------------------------------------|
| Institution                                                    | Stanford                                                                               | Henry Ford                                                                                    | Unity Health                                                     | UNIFESP               | Einstein                                                                         | TUMS                                                        | GUMS                 | Rajaie                | Koç                                                                                                                                                    | Kyungpook                                                                               |
| <b>Slice Thickness</b>                                         | 1mm                                                                                    | 1.25mm<br>1.4mm<br>2mm                                                                        | 3mm                                                              | 3mm                   | 1.0mm                                                                            | 0.75mm<br>1.5mm<br>2.5mm                                    | 1.2mm                | 1.5mm                 | 1mm<br>1.5mm                                                                                                                                           | 1mm<br>1.25mm<br>5mm                                                                    |
| <b>Image Matrix</b>                                            | 512 x 512                                                                              | 512 x 512                                                                                     | 512 x 512                                                        | 512 x 512             | 512 x 512                                                                        | 512 x 512                                                   | 512 x 512            | 512 x 512             | 512 x 512                                                                                                                                              | 512 x 512                                                                               |
| <b>Models</b>                                                  | GE LightSpeed VCT<br><br>Siemens SOMATOM Definition Flash<br><br>Siemens SOMATOM Force | GE LightSpeed VCT<br><br>GE Optima CT660<br><br>Philips Brilliance 64<br><br>Toshiba Aquilion | GE LightSpeed VCT<br><br>GE Optima CT660<br><br>GE Revolution CT | Philips Brilliance 64 | Siemens SOMATOM Definition AS<br><br>Siemens Biograph 40<br><br>Toshiba Aquilion | Siemens SOMATOM Emotion 6<br><br>Siemens SOMATOM Emotion 16 | GE HiSpeed NX/I Dual | Siemens SOMATOM Scope | GE LightSpeed Pro 16<br><br>GE Revolution CT<br><br>Philips Brilliance 64<br><br>Siemens SOMATOM Definition AS<br><br>Siemens SOMATOM Definition Flash | GE Optima CT660<br><br>Siemens SOMATOM Definition AS<br><br>Siemens SOMATOM Perspective |

**Supplementary Figure 1.** Scanner models and slice thicknesses by institution.

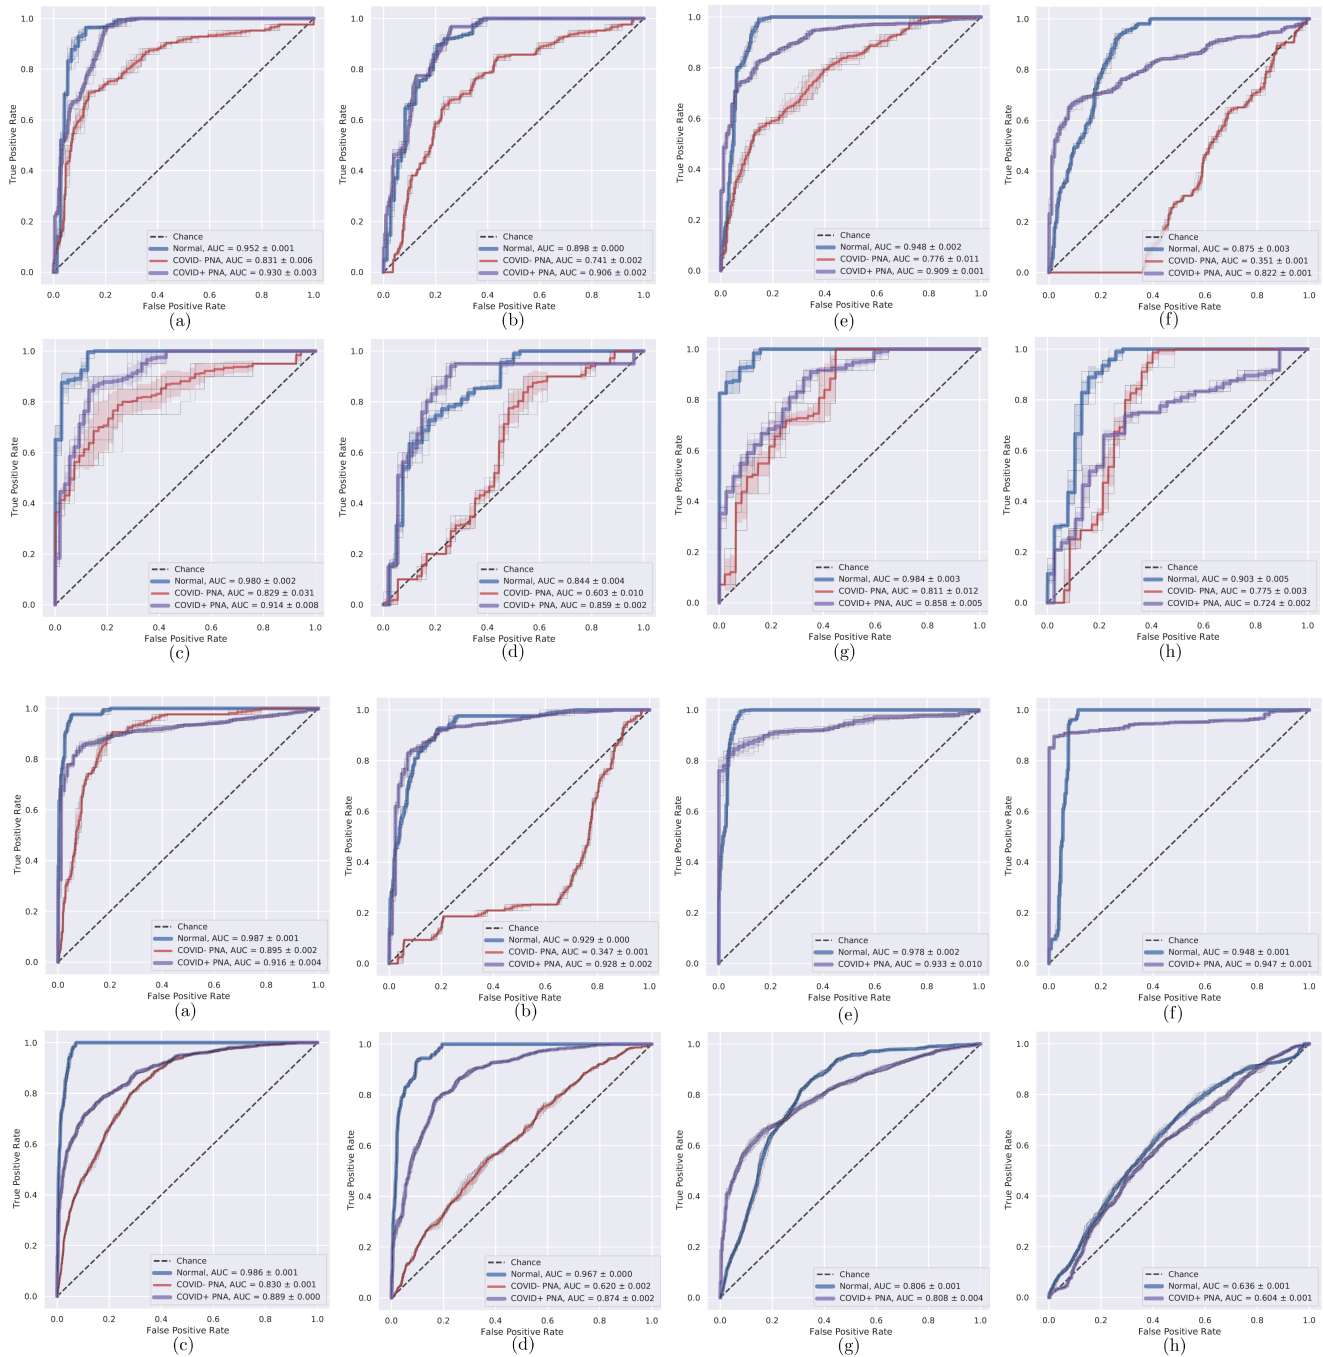

**Supplementary Figure 2.** ROC curves for Table 2 of the manuscript comparing performance with and without training on sites 2 to 11. Sites are 3 (a, b), 4 (c,d), 5 (e,f), 6 (g,h) as shown on the top half, and 8 (a,b), 9 (c,d), 10 (e,f), 11 (g,h) on the bottom half.

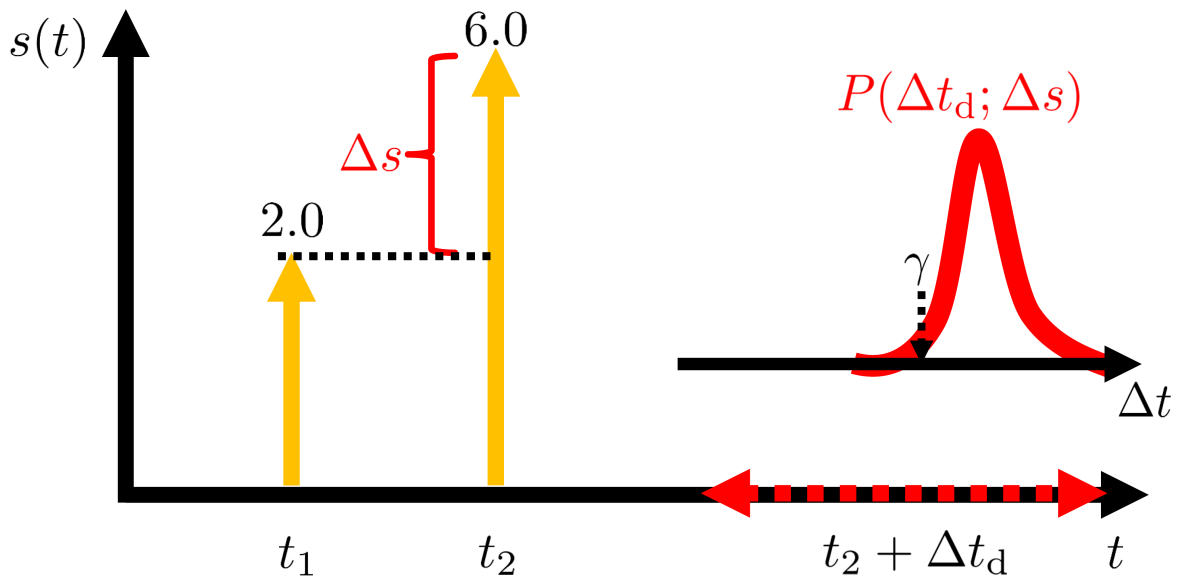

a) high-risk

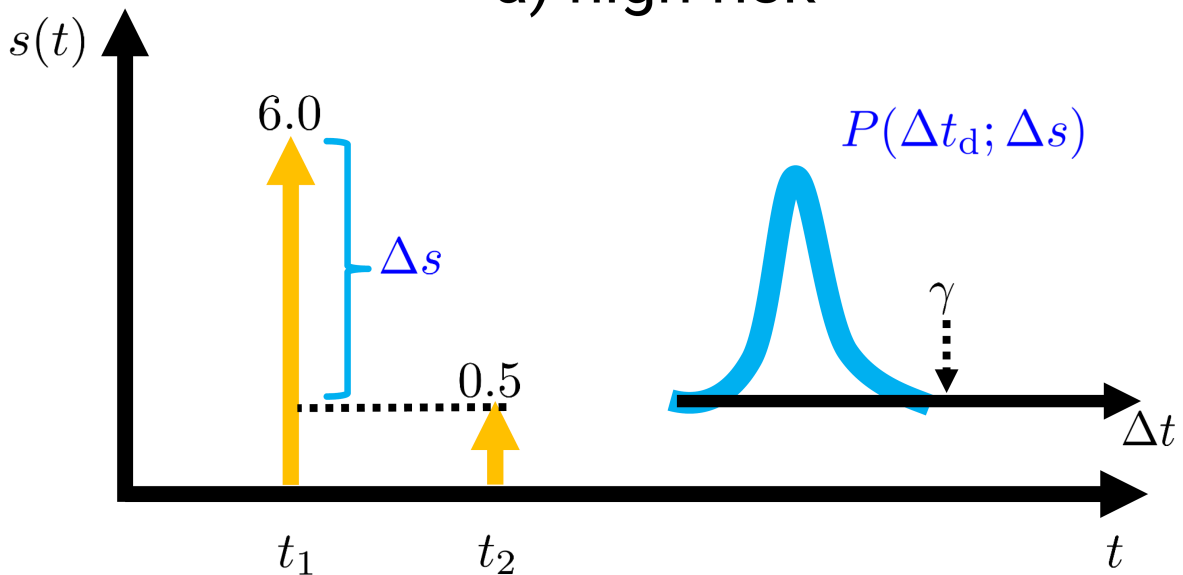

b) low-risk

**Supplementary Figure 3.** Two scenarios of using DCD features to predict prognosis: patient A (top, a) is scanned on day  $t_1$  and  $t_2$ . DCD predicts COVID scores of  $s(t_1) = 2$  and  $s(t_2) = 6$ , indicating a significant rise in COVID-like features. If scan dates are close apart, then it is reasonable to say that patient A's prognosis is "high-risk" and may remain hospitalized for longer than average  $\Delta t_d > \gamma$ . Conversely, patient B's prognosis is classified as "low-risk".  $P$  represents the probability density function of the time-to-discharge parameter  $\Delta t_d$ .
